## CORRECTION

# Correction: Willing to pay to save the planet? Evaluating support for increased spending on sustainable development and environmentally friendly policies in five countries

Arpad Todor

The author's name appears incorrectly. The correct name is Arpad Todor. The correct citation is: Todor A (2018) Willing to pay to save the planet? Evaluating support for increased spending on sustainable development and environmentally friendly policies in five countries. PLoS ONE 13(11): e0207862. <https://doi.org/10.1371/journal.pone.0207862>.

## Reference

1. Arpad T (2018) Willing to pay to save the planet? Evaluating support for increased spending on sustainable development and environmentally friendly policies in five countries. PLoS ONE 13(11): e0207862. <https://doi.org/10.1371/journal.pone.0207862> PMID: [30496230](https://pubmed.ncbi.nlm.nih.gov/30496230/)

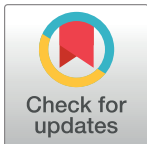

## OPEN ACCESS

**Citation:** Todor A (2019) Correction: Willing to pay to save the planet? Evaluating support for increased spending on sustainable development and environmentally friendly policies in five countries. PLoS ONE 14(5): e0216571. <https://doi.org/10.1371/journal.pone.0216571>

**Published:** May 3, 2019

**Copyright:** © 2019 Arpad Todor. This is an open access article distributed under the terms of the [Creative Commons Attribution License](https://creativecommons.org/licenses/by/4.0/), which permits unrestricted use, distribution, and reproduction in any medium, provided the original author and source are credited.
